# Supplementary material for: Total Polysaccharides of Lily Bulb Ameliorate Menopause-Like Behavior in Ovariectomized Mice: Multiple Mechanisms Distinct from Estrogen Therapy
Source: Oxid Med Cell Longev. 2019 Jul 25;2019:6869350. doi: 10.1155/2019/6869350 (PMC6683782; doi:10.1155/2019/6869350)
Supplement: Supplementary Materials — S-Table 1: list of various antibodies used in western blot analysis. S-Table 2: the involved gene names and the corresponding protein names in the KEGG pathways and volcano plots. S-Fig. 1: the effects of three doses of TPLB on body weight, uterine weight, and serum estradiol. (A) Variation of net body weight on the 14th day after OVX; (B) ratio of the uterus to body weight at the end of the 5-week treatment period; (C) serum estradiol levels. Data are expressed as mean ± SEM (n = 10) and examined with one-way ANOVA, followed by post hoc Dunnett's test: ∗ P < 0.05, ∗∗ P < 0.01, and ∗∗∗ P < 0.001 vs. the sham group; # P < 0.05, ## P < 0.01, and ### P < 0.001 vs. the OVX group. S-Fig. 2: the representational HPLC-DAD chromatograms for the measurement of glutamate and GABA (A) in the hypothalamus (B), hippocampus (C), and prefrontal cortex (D). S-Fig. 3: the effects of TPLB on the GABAergic system in the brain regions. GABA levels (n = 6) in the hypothalamus (A), hippocampus (B), and prefrontal cortex (C); representative images indicating the expression levels (n = 3) of GABAAα1 and GAD67 and their quantification analysis in the hypothalamus (D-E), hippocampus (F-G), and prefrontal cortex (H-I). Data are expressed as mean ± SEM and examined with one-way ANOVA, followed by post hoc Dunnett's test: ∗ P < 0.05, ∗∗ P < 0.01, and ∗∗∗ P < 0.001 vs. the sham group; # P < 0.05, ## P < 0.01, and ### P < 0.001 vs. the OVX group. S-Fig. 4: the effects of TPLB on the glutamatergic system in the brain regions. Glutamate levels (n = 6) in the hippocampus (A) and prefrontal cortex (B); representative images indicating the expression levels (n = 3) of NMDAR1 and CaMKII and their quantification analysis in the hippocampus (C-D) and prefrontal cortex (E-F). Data are expressed as mean ± SEM and examined with one-way ANOVA, followed by post hoc Dunnett's test: ∗ P < 0.05, ∗∗ P < 0.01, and ∗∗∗ P < 0.001; # P < 0.05, ## P < 0.01, and ### P < 0.001 vs. the OVX group. S-Fig. 5: the effects of [file 6869350.f1.pdf]

## Supplementary materials

**S-Table 1. List of various antibodies used in Western blot analysis**

| Primary Antibody                                                          | Species/clonality | Dilution | Manufacturer |
|---------------------------------------------------------------------------|-------------------|----------|--------------|
| Estrogen receptor $\alpha$ (ER $\alpha$ )                                 | Rabbit monoclonal | 1:1000   | Invitrogen   |
| Estrogen receptor $\beta$ (ER $\beta$ )                                   | Mouse monoclonal  | 1:4000   | Abcam        |
| Brain-derived neurotrophic factor (BDNF)                                  | Rabbit polyclonal | 1:1000   | Santa Cruz   |
| Nerve growth factor (NGF)                                                 | Rabbit polyclonal | 1:1000   | Abcam        |
| Glial cell-derived neurotrophic factor (GDNF)                             | Rabbit polyclonal | 1:1000   | Abcam        |
| Tyrosine hydroxylase (TH)                                                 | Rabbit monoclonal | 1:1000   | Santa Cruz   |
| Serotonin transporter (ST)                                                | Mouse monoclonal  | 1:1000   | Santa Cruz   |
| Gamma-aminobutyric acid A receptor alpha 1 (GABA <sub>A</sub> $\alpha$ 1) | Goat monoclonal   | 1:1000   | Santa Cruz   |
| Glutamate decarboxylase (GAD 65)                                          | Mouse monoclonal  | 1:2000   | Abcam        |
| N-methyl-D-aspartate receptor subunit 1 (NMDAR1)                          | Goat monoclonal   | 1:2000   | Santa Cruz   |
| Protein Kinase B (Akt)                                                    | Rabbit polyclonal | 1:1000   | CST          |
| Phospho-Akt (p-Akt)                                                       | Rabbit polyclonal | 1:1000   | CST          |
| cAMP-response element binding protein (CREB)                              | Rabbit monoclonal | 1:1000   | CST          |
| Phospho-CREB (p-CREB)                                                     | Rabbit monoclonal | 1:1000   | CST          |
| Extracellular signal-regulated kinases (ERK)                              | Rabbit polyclonal | 1:1000   | CST          |
| Phospho- ERK (p- ERK)                                                     | Rabbit polyclonal | 1:1000   | CST          |
| Ras                                                                       | Rabbit polyclonal | 1:1000   | CST          |
| Calmodulin-dependent protein kinase II (CaMKII)                           | Mouse monoclonal  | 1:2000   | Santa Cruz   |
| Phospho-CaMKII (p-CaMKII)                                                 | Mouse monoclonal  | 1:2000   | Santa Cruz   |
| Serotonin receptor 1A (SR-1A)                                             | Rabbit monoclonal | 1:1000   | Santa Cruz   |
| Glyceraldehyde-3-phosphate dehydrogenase (GAPDH)                          | Mouse monoclonal  | 1:5000   | Immunoway    |

**S-Table 2. The involved gene names and the corresponding protein names in the KEGG pathways and volcano plots**

| Protein name                                                                                                                                                                                  | Gene name                                                                                                     |
|-----------------------------------------------------------------------------------------------------------------------------------------------------------------------------------------------|---------------------------------------------------------------------------------------------------------------|
| Fibroblast growth factor 12                                                                                                                                                                   | Fgf12                                                                                                         |
| Protein phosphatase 1B                                                                                                                                                                        | Ppm1b                                                                                                         |
| RAC-gamma serine/threonine-protein kinase                                                                                                                                                     | Akt3                                                                                                          |
| GTPase NRas                                                                                                                                                                                   | Nras                                                                                                          |
| Ankyrin-1                                                                                                                                                                                     | Ank1                                                                                                          |
| Integrin alpha-V                                                                                                                                                                              | Itgav                                                                                                         |
| NADH dehydrogenase [ubiquinone] 1 alpha subcomplex subunit 7                                                                                                                                  | Ndufa7                                                                                                        |
| Cytochrome b-c1 complex subunit 9                                                                                                                                                             | Uqcr10                                                                                                        |
| ATP synthase protein 8                                                                                                                                                                        | ATP8                                                                                                          |
| Metabotropic glutamate receptor 1                                                                                                                                                             | Grm1                                                                                                          |
| Inositol 1,4,5-trisphosphate receptor type 1                                                                                                                                                  | Itpr1                                                                                                         |
| Phosphoinositide phospholipase C                                                                                                                                                              | PLC                                                                                                           |
| Dual specificity mitogen-activated protein kinase kinase 2                                                                                                                                    | Map2k2                                                                                                        |
| Ras-related protein Rab-5B                                                                                                                                                                    | Rab5b                                                                                                         |
| Transcription factor A, mitochondrial                                                                                                                                                         | Tfam                                                                                                          |
| Serine protease HTRA2, mitochondrial                                                                                                                                                          | Htra2                                                                                                         |
| Thymosin beta-4; Hematopoietic system regulatory peptide                                                                                                                                      | Tmsb4x                                                                                                        |
| Core histone macro-H2A.2; Core histone macro-H2A                                                                                                                                              | H2afy2                                                                                                        |
| Histone H3; Histone H3.2; Histone H3.1                                                                                                                                                        | Hist1h3e;Hist2h3b;Hist1h3b;H3f3a;Hist1h3i;Hist1h3a                                                            |
| Histone H2B; Histone H2B type 1-P;Histone H2B type 1-K;Histone H2B type 1-C/E/G; Histone H2B type 2-B;Histone H2B type 1-H;Histone H2B type 1-B;Histone H2B type 1-M;Histone H2B type 1-F/J/L | Hist1h2bj;Hist1h2bk;Hist1h2bm;Hist1h2br;LOC665622;Hist1h2bp;Hist1h2bc;Hist2h2bb;Hist1h2bh;Hist1h2bb;Hist1h2bf |
| Histone H4                                                                                                                                                                                    | Hist2h4;Hist1h4a                                                                                              |
| Histone H2B type 3-A; Histone H2B type 3-B;Histone H2B type 2-E                                                                                                                               | Hist3h2ba;Hist3h2bb;Hist2h2be                                                                                 |
| Alpha-actinin-2                                                                                                                                                                               | Actn2                                                                                                         |
| Alpha-actinin-4                                                                                                                                                                               | Actn4                                                                                                         |
| Calcium/calmodulin-dependent protein kinase kinase 1                                                                                                                                          | Camkk1                                                                                                        |
| Guanine nucleotide-binding protein G(I)/G(S)/G(O) subunit gamma-4; Guanine nucleotide-binding protein subunit gamma                                                                           | Gng4                                                                                                          |

|                                                                                                                                                   |        |
|---------------------------------------------------------------------------------------------------------------------------------------------------|--------|
| Chromodomain-helicase-DNA-binding protein 4                                                                                                       | Chd4   |
| Calcium/calmodulin-dependent protein kinase type IV                                                                                               | Camk4  |
| Metabotropic glutamate receptor 1                                                                                                                 | Grm1   |
| Inositol 1,4,5-trisphosphate receptor type 1                                                                                                      | Itpr1  |
| Phosphoinositide phospholipase C                                                                                                                  | Plcb4  |
| Peptidyl-prolyl cis-trans isomerase FKBP4; Peptidyl-prolyl cis-trans isomerase FKBP4, N-terminally processed; Peptidyl-prolyl cis-trans isomerase | Fkbp4  |
| RAC-alpha serine/threonine-protein kinase                                                                                                         | Akt1   |
| Gap junction alpha-1 protein; Gap junction protein                                                                                                | Gja1   |
| Tubulin alpha-8 chain                                                                                                                             | Tuba8  |
| Sodium/potassium-transporting ATPase subunit beta-2                                                                                               | Atp1b2 |
| Glutamate receptor 2                                                                                                                              | Gria2  |
| Amino acid transporter; Excitatory amino acid transporter 1                                                                                       | Slc1a3 |
| Homer protein homolog 2                                                                                                                           | Homer2 |

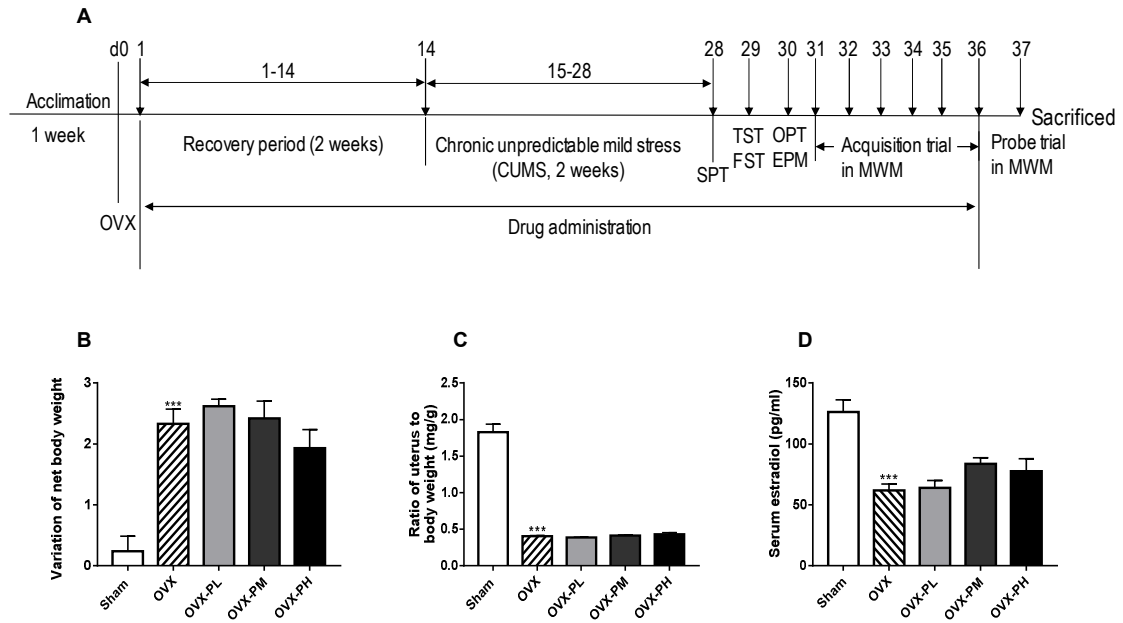

**S-Fig. 1.** The effects of three doses of TPLB on body weight, uterine weight and serum estradiol. (A) Variation of net body weight on the 14th day after OVX; (B) Ratio of uterus to body weight at the end of the 5-week treatment period; (C) Serum estradiol levels. Data are expressed as mean  $\pm$  SEM ( $n = 10$ ) and examined with one-way ANOVA, followed by post hoc Dunnett's test: \*  $P < 0.05$ , \*\*  $P < 0.01$ , \*\*\*  $P < 0.001$  vs the Sham group; #  $P < 0.05$ , ##  $P < 0.01$ , ###  $P < 0.001$  vs the OVX group.

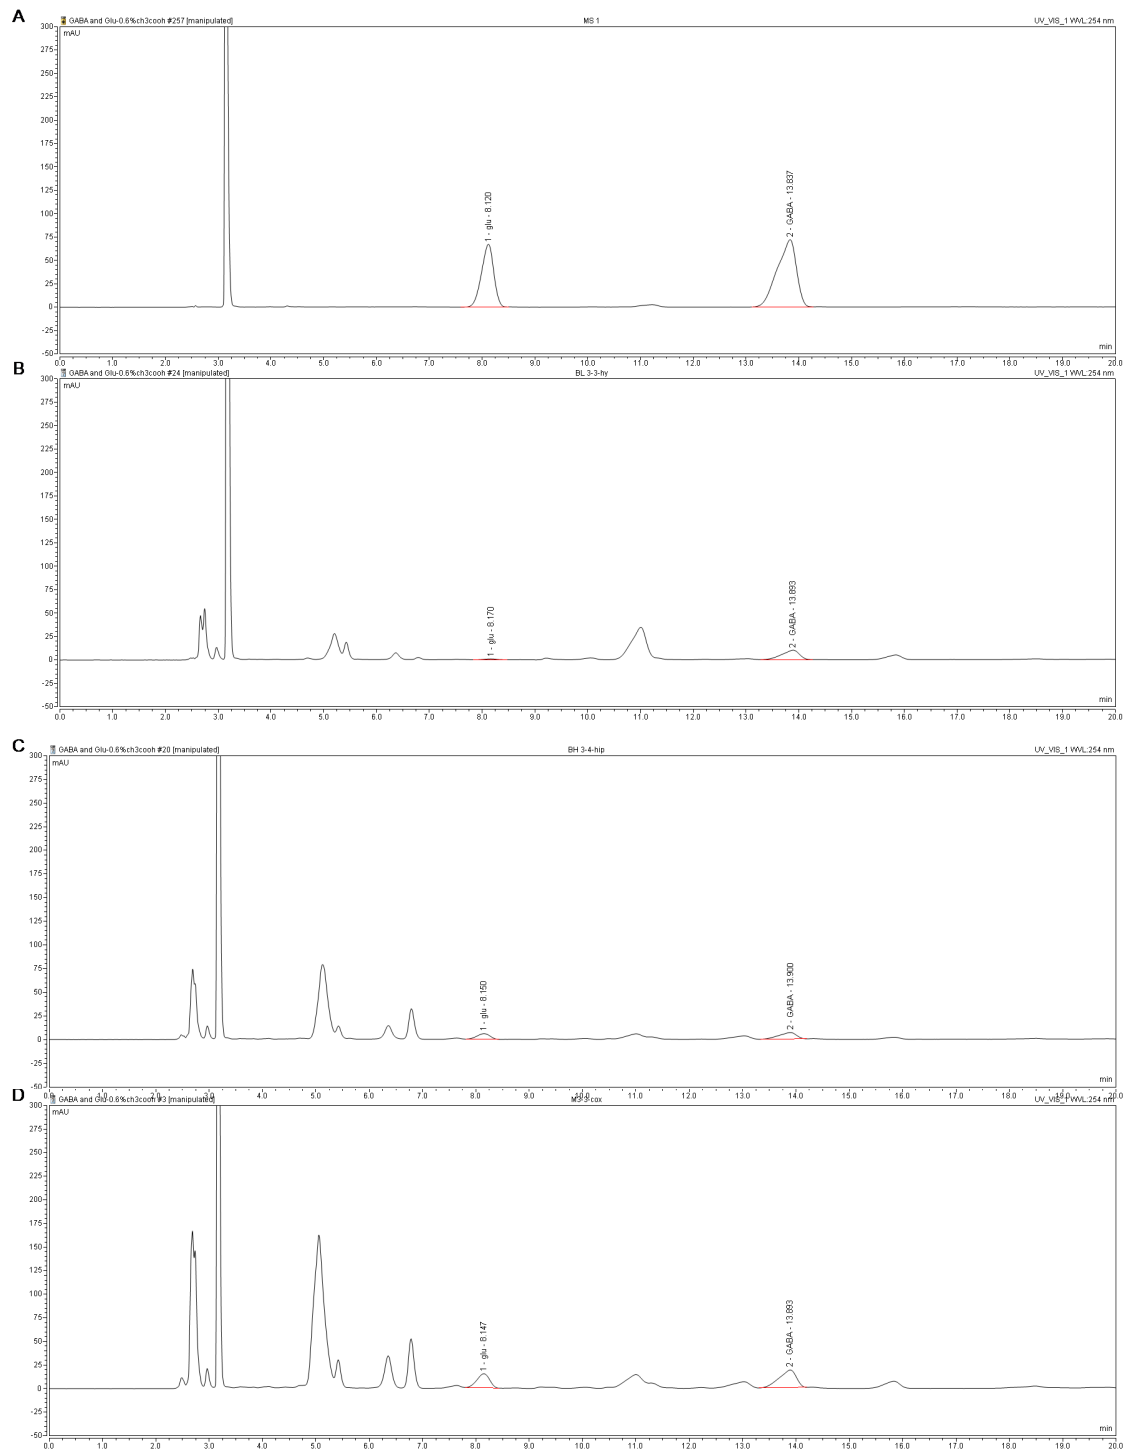

**S-Fig. 2.** The representational HPLC-DAD chromatograms for measurement of Glutamate and GABA (A) in hypothalamus (B), hippocampus (C) and prefrontal cortex (D).

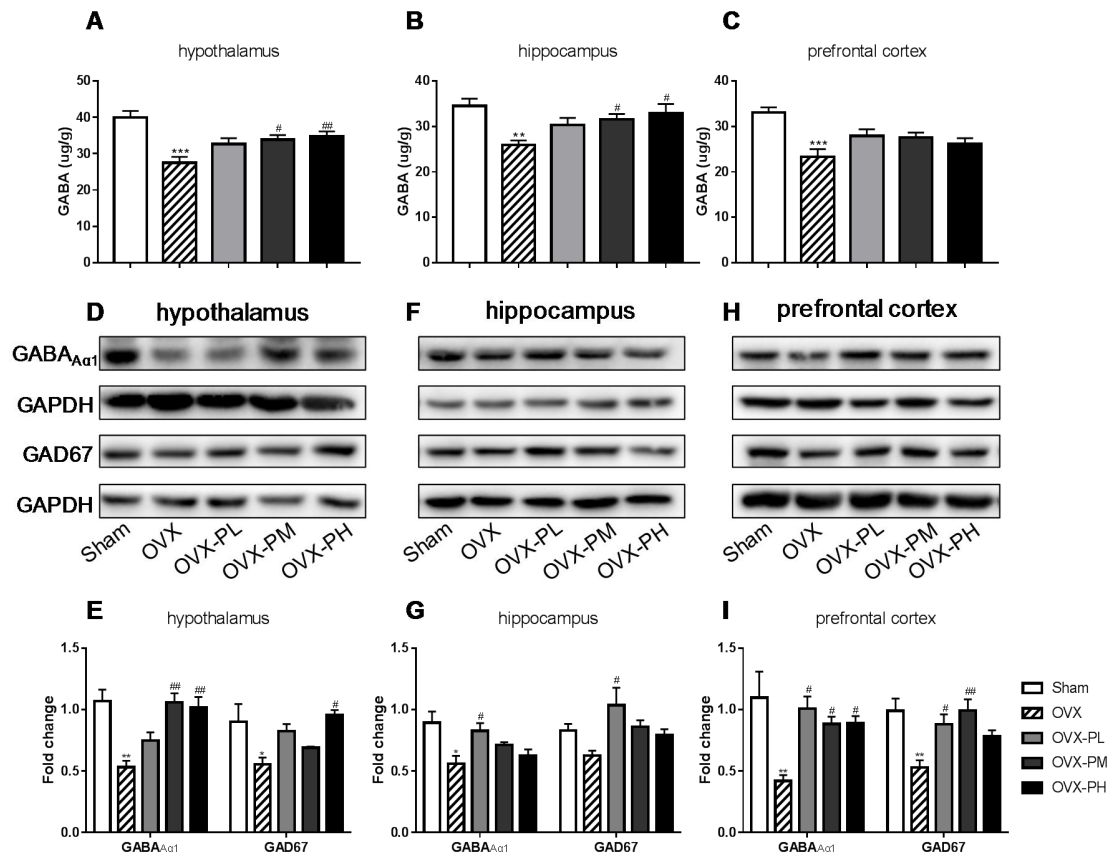

**S-Fig. 3.** The effects of TPLB on the GABAergic system in brain regions. GABA levels ( $n = 6$ ) in hypothalamus (A), hippocampus (B) and prefrontal cortex (C); representative images indicating the expression levels ( $n = 3$ ) of GABA<sub>Aα1</sub> and GAD67 and their quantification analysis in hypothalamus (D-E), hippocampus (F-G) and prefrontal cortex (H-I). Data are expressed as mean  $\pm$  SEM and examined with one-way ANOVA, followed by post hoc Dunnett's test: \*  $P < 0.05$ , \*\*  $P < 0.01$ , \*\*\*  $P < 0.001$  vs the Sham group; #  $P < 0.05$ , ##  $P < 0.01$ , ###  $P < 0.001$  vs the OVX group.

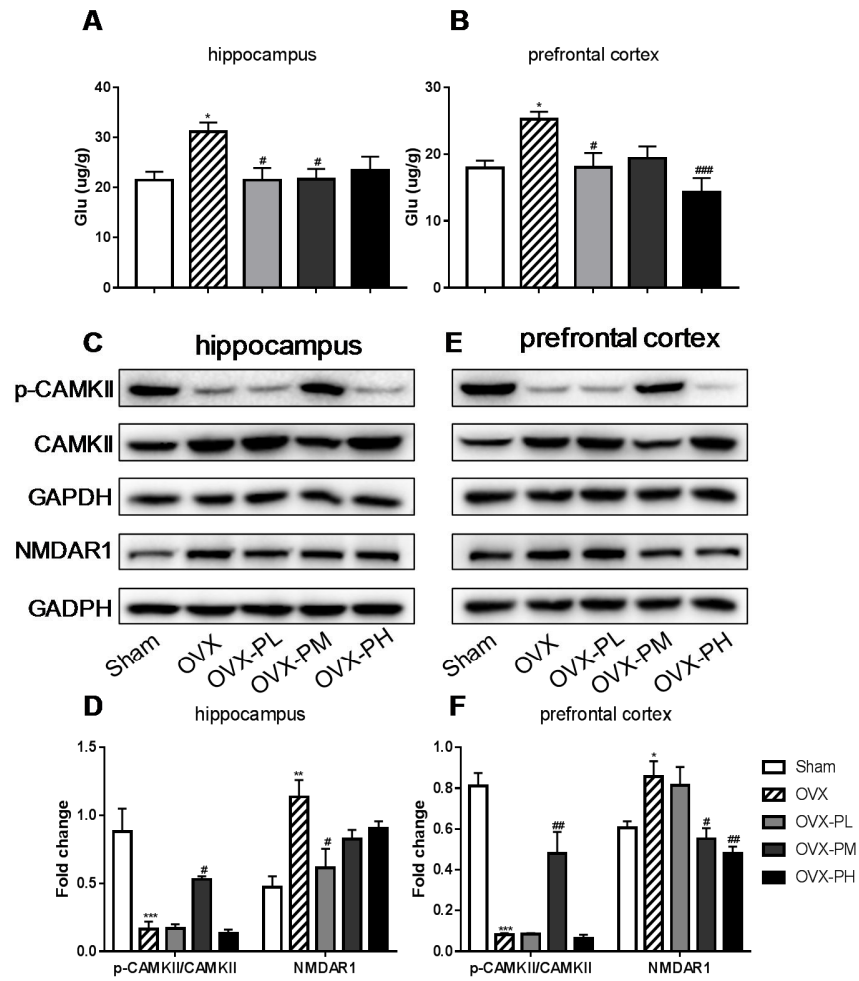

**S-Fig. 4.** The effects of TPLB on the on the glutamatergic system in brain regions. Glutamate levels ( $n = 6$ ) in hippocampus (A) and prefrontal cortex (B); representative images indicating the expression levels ( $n = 3$ ) of NMDAR1 and CaMKII and their quantification analysis in hippocampus (C-D) and prefrontal cortex (E-F). Data are expressed as mean  $\pm$  SEM and examined with one-way ANOVA, followed by post hoc Dunnett's test: \*  $P < 0.05$ , \*\*  $P < 0.01$ , \*\*\*  $P < 0.001$ ; #  $P < 0.05$ , ##  $P < 0.01$ , ###  $P < 0.001$  vs the OVX group.

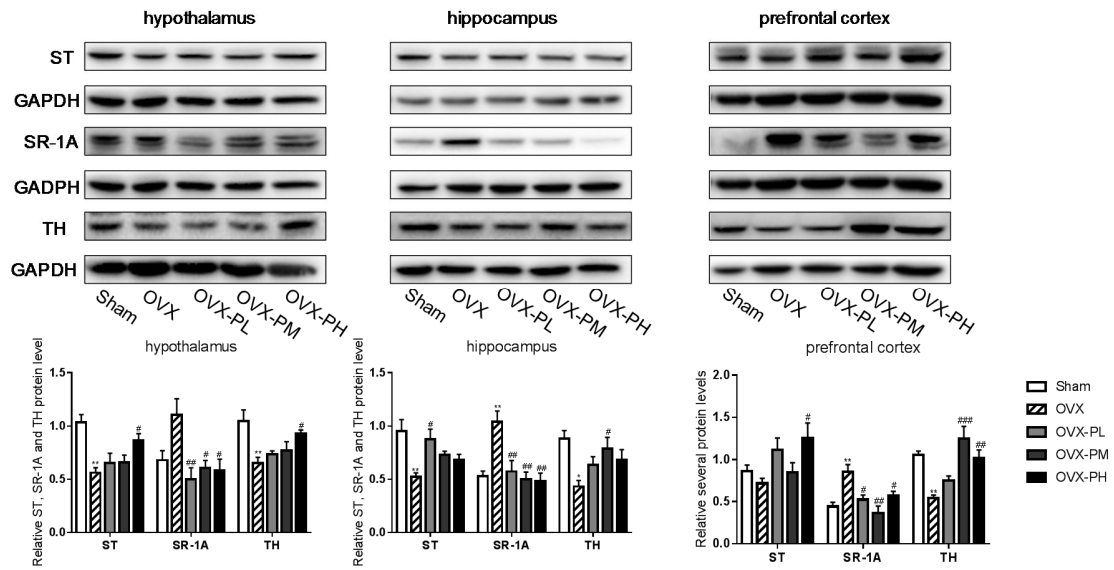

**S-Fig. 5** The effects of three doses of TPLB on the serotonergic and catecholaminergic systems in brain regions. Representative images indicating the expression levels of ST and SR-1A, TH and their quantification analysis in hypothalamus (A-B), hippocampus (C-D) and prefrontal cortex (E-F). Data are expressed as mean  $\pm$  SEM ( $n = 3$ ) and examined with one-way ANOVA, followed by post hoc Dunnett's test: \*  $P < 0.05$ , \*\*  $P < 0.01$ , \*\*\*  $P < 0.001$ ; #  $P < 0.05$ , ##  $P < 0.01$ , ###  $P < 0.001$  vs the OVX group.

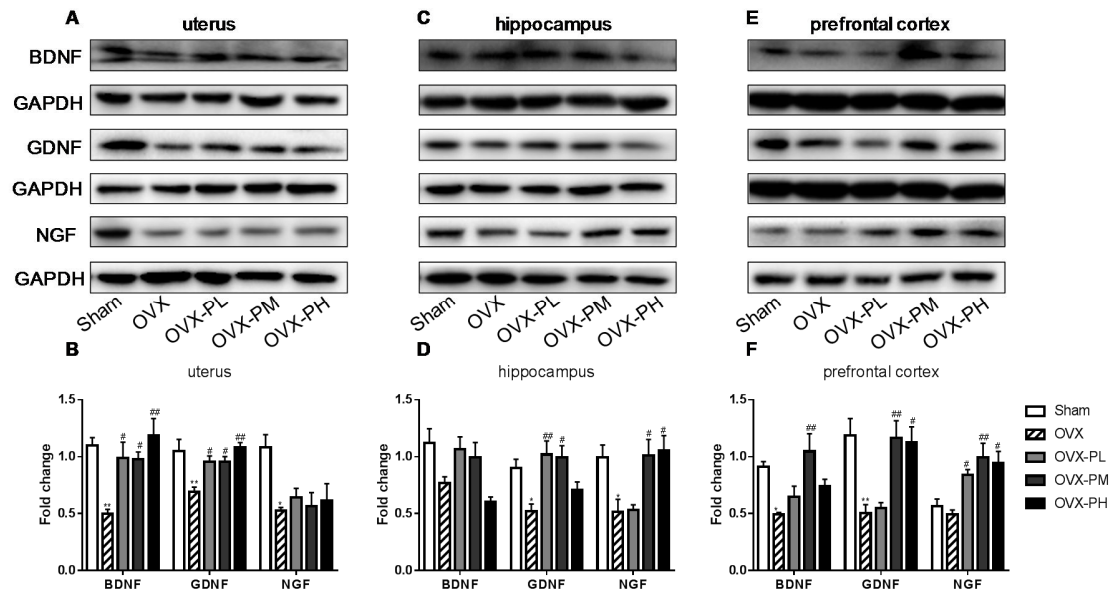

**S-Fig. 6** The effects of three doses of TPLB on the expression levels of neurotrophins, BDNF, GDNF and NGF, in uterus, hippocampus and prefrontal cortex. Representative images indicating the expression levels of three neurotrophins and their quantification analysis in uterus (A-B), hippocampus (C-D) and prefrontal cortex (E-F). Data are expressed as mean  $\pm$  SEM ( $n = 3$ ) and examined with one-way ANOVA, followed by post hoc Dunnett's test: \*  $P < 0.05$ , \*\*  $P < 0.01$ , \*\*\*  $P < 0.001$ ; #  $P < 0.05$ , ##  $P < 0.01$ , ###  $P < 0.001$  vs the OVX group.

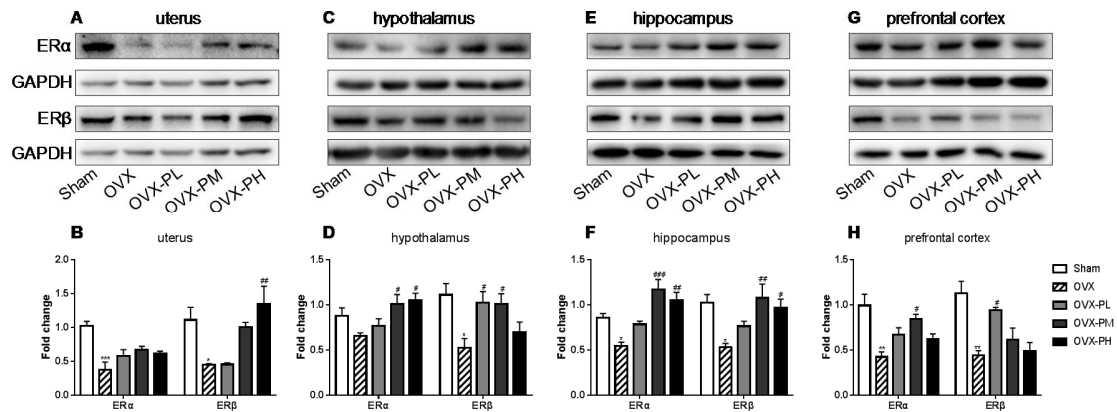

**S-Fig. 7.** The effects of three doses of TPLB on the expression levels of estrogen receptors, ER $\alpha$  and ER $\beta$ , in uterus and brain regions. Representative images indicating the expression levels of ER $\alpha$  and ER $\beta$  and their quantification analysis in uterus (A-B), hypothalamus (C-D), hippocampus (E-F) and prefrontal cortex (G-H). Data are expressed as mean  $\pm$  SEM ( $n = 3$ ) and examined with one-way ANOVA, followed by post hoc Dunnett's test: \*  $P < 0.05$ , \*\*  $P < 0.01$ , \*\*\*  $P < 0.001$ ; #  $P < 0.05$ , ##  $P < 0.01$ , ###  $P < 0.001$  vs the OVX group.

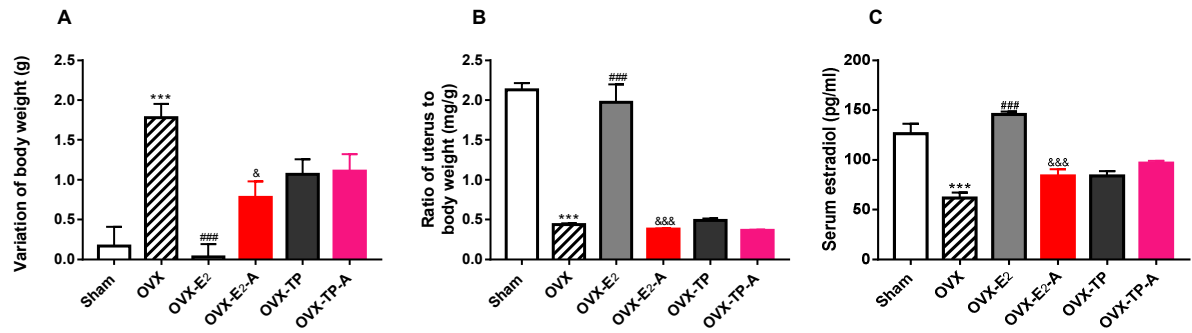

**S-Fig. 8.** The effects of estradiol and TPLB on body weight, uterine weight and serum estradiol after co-administration with ICI182,780. (A) Variation of net body weight on the 14th day after OVX; (B) Ratio of uterus to body weight at the end of the 5-week treatment period; (C) Serum estradiol levels. Data are expressed as mean  $\pm$  SEM (n = 10) and examined with one-way ANOVA, followed by post hoc Sidak's multiple comparisons test: \*  $P < 0.05$ , \*\*  $P < 0.01$ , \*\*\*  $P < 0.001$  vs the Sham group; #  $P < 0.05$ , ##  $P < 0.01$ , ###  $P < 0.001$  vs the OVX group; &  $P < 0.05$ , &&  $P < 0.01$ , &&&  $P < 0.001$  vs the E<sub>2</sub> group or TP group.

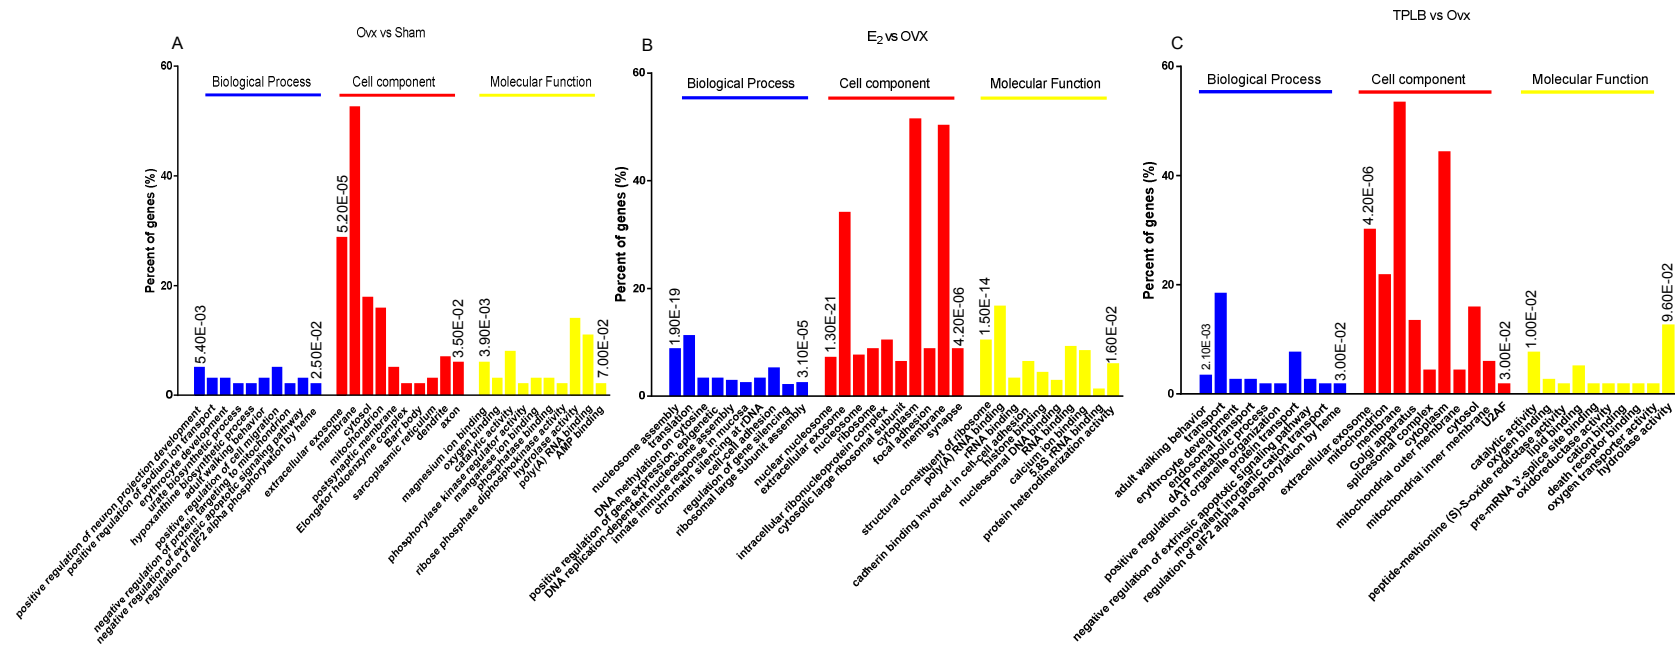

**S-Fig. 9.** The ten most significantly enriched three terms in gene ontology (GO): biological process, cell component, and molecular function.
